# Supplementary material for: A facile strategy for the synthesis of water-soluble fluorescent nonconjugated polymer dots and their application in tetracycline detection
Source: Royal Society of Chemistry journal article supplement (doi:10.1039/c9tc02738f), 2019-01-01
Supplement: c9tc02738f1.pdf [file c9tc02738f1.pdf]

## Supporting Information

### **A facile strategy for the synthesis of water-soluble fluorescent nonconjugated polymer dots and their applications in tetracyclines detection**

Yang Chen,<sup>a,\*</sup> Yang Zhang,<sup>a,†</sup> Tiantian Lyu,<sup>a,†</sup> Ying Wang,<sup>a</sup> Xudong Yang,<sup>b</sup> and  
Xiaodan Wu<sup>a</sup>

<sup>a</sup>College of Science, Northeast Forestry University, Harbin 150040, P. R. China

<sup>b</sup>School of Chemical Engineering, Advanced Institute of Materials Science,  
Changchun University of Technology, Changchun 130012, P. R. China

†these authors contributed equally to this work

\*Corresponding author:

Dr. Yang Chen

E-mail: ychen@nefu.edu.cn

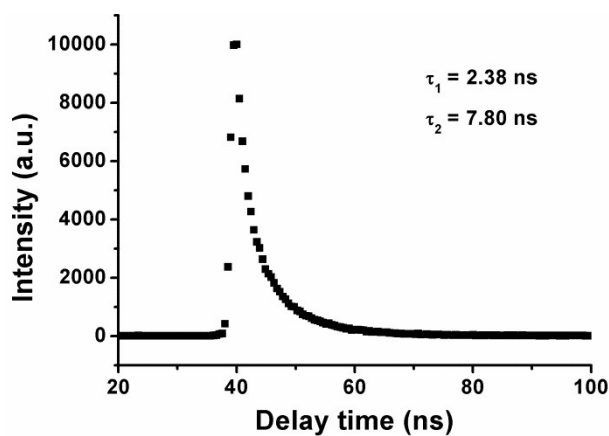

**Fig. S1** Fluorescence decay curve of the PEI-AA NCPdots ( $\lambda_{\text{ex}} = 365 \text{ nm}$ ,  $\lambda_{\text{em}} = 485 \text{ nm}$ ,  $\chi^2 = 1.140$ ). The fractional weights of  $\tau_1$  and  $\tau_2$  are 39.33% and 60.67%, respectively. The intensity-weighted average lifetime was 6.90 ns, which was calculated according to the literature reported procedures.<sup>[S1, S2]</sup>

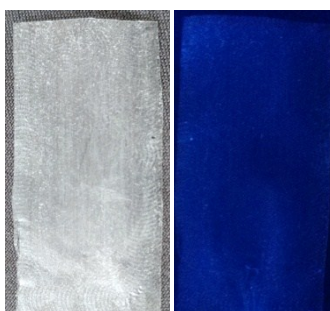

**Fig. S2** Photographs of PVA film under visible light (left) and 365 nm UV light illumination (right).

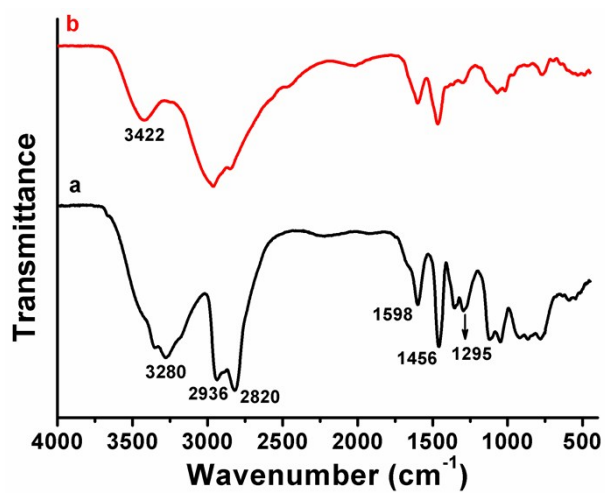

**Fig. S3** FT-IR spectra of (a) the PEI-AA NCPdots and (b) PEI.

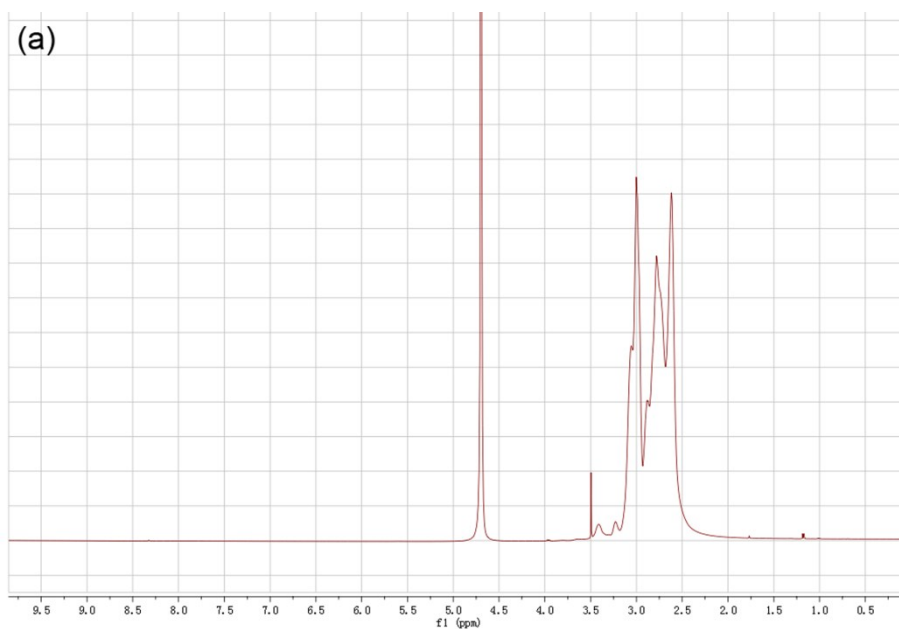

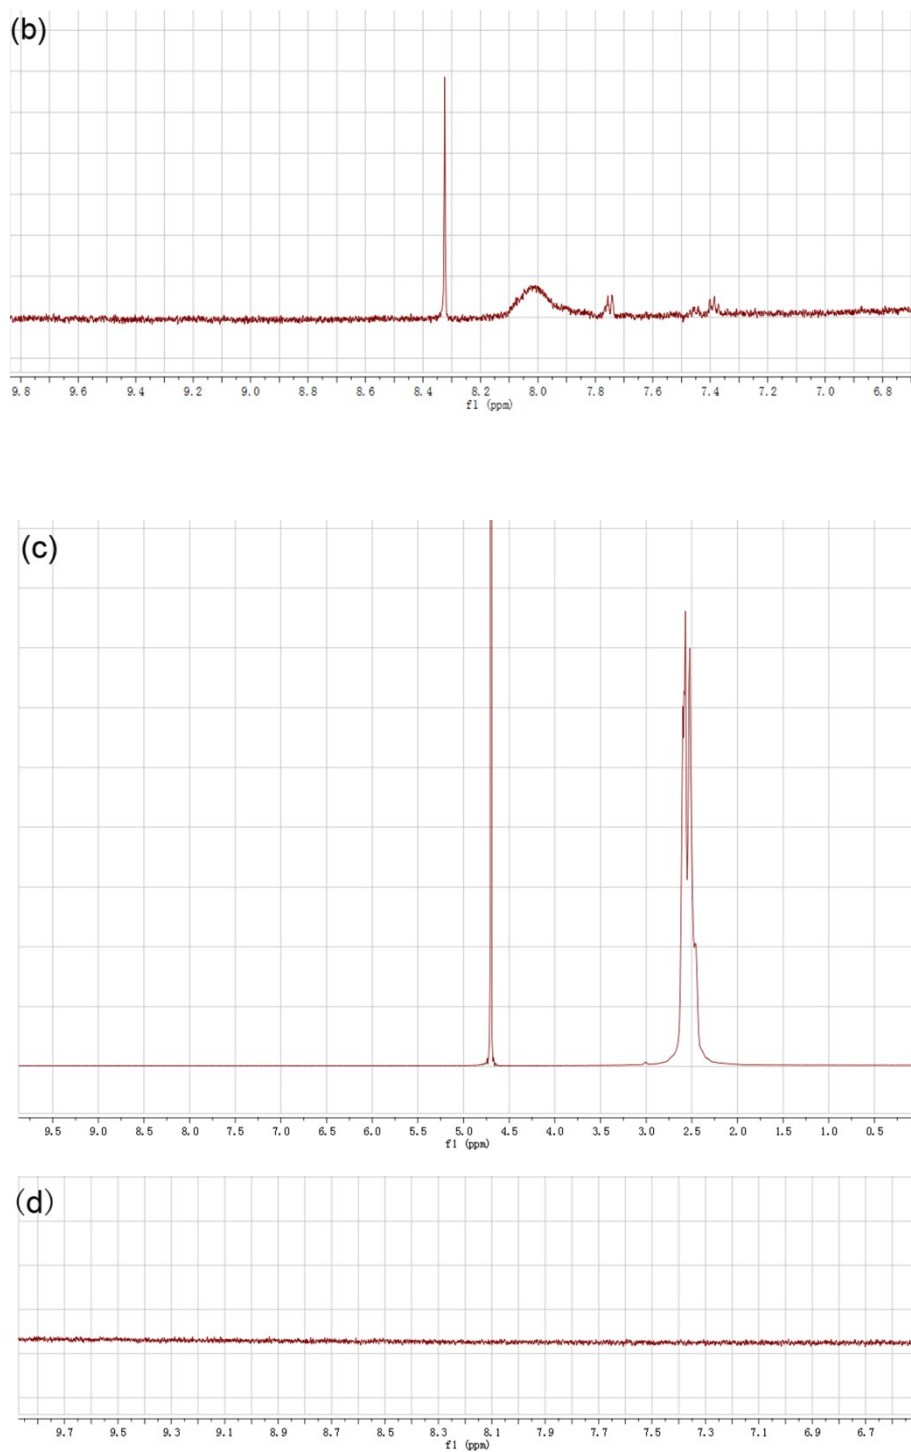

**Fig. S4** <sup>1</sup>H-NMR spectra of the PEI-AA NCPdots (a) and PEI (c) in D<sub>2</sub>O. (b) and (d) are partial expansion of <sup>1</sup>H-NMR spectra of (a) and (c), respectively.

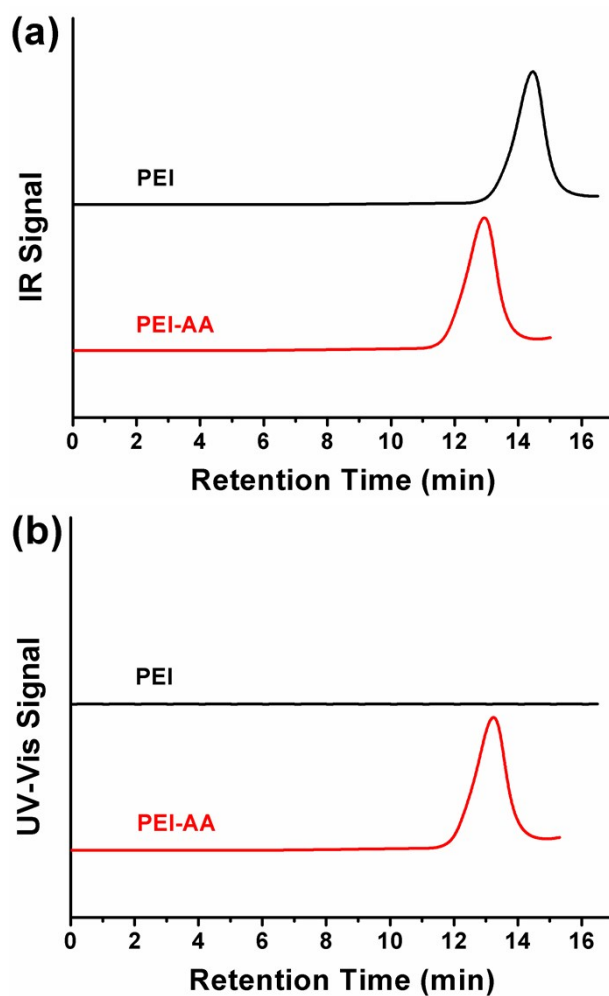

**Fig. S5** GPC curves of PEI and PEI-AA NCPdots based on the RI signal (a) and the UV-Vis signal at 360 nm (b).

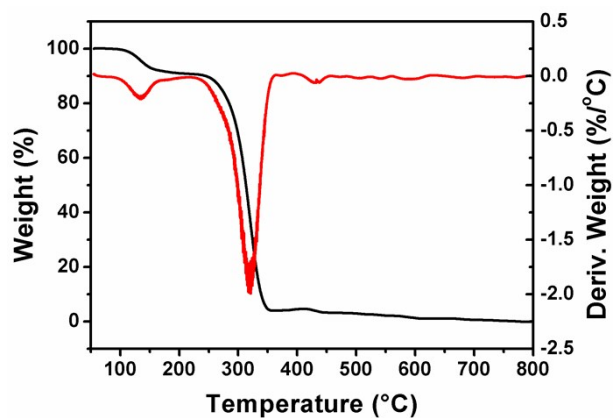

**Fig. S6** Thermogravimetric curve (black) and derivative thermogravimetric curve (red) of the PEI-AA NCPdots.

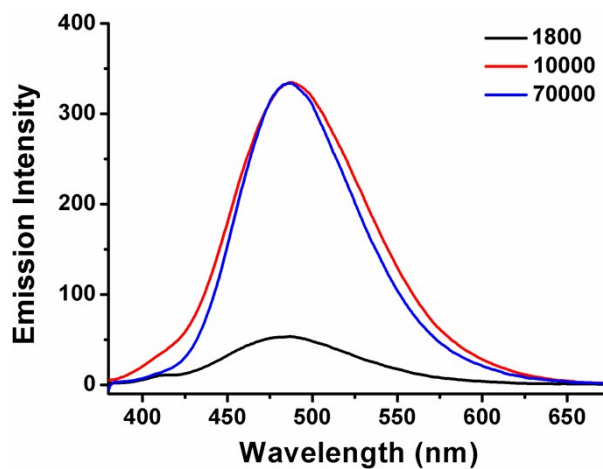

**Fig. S7** Fluorescence emission spectra of the PEI-AA NCPdots prepared from commercial hyperbranched PEI with different molecular weight.

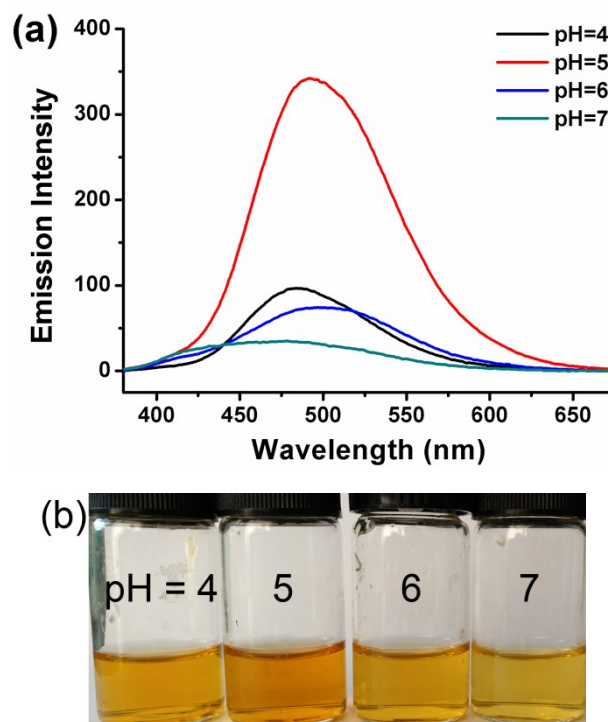

**Fig. S8** (a) Fluorescence emission spectra of prepared at different pH value ( $\lambda_{\text{ex}} = 360$  nm). (b) The corresponding photographs of the PEI-AA NCPdots solutions under daylight lamp.

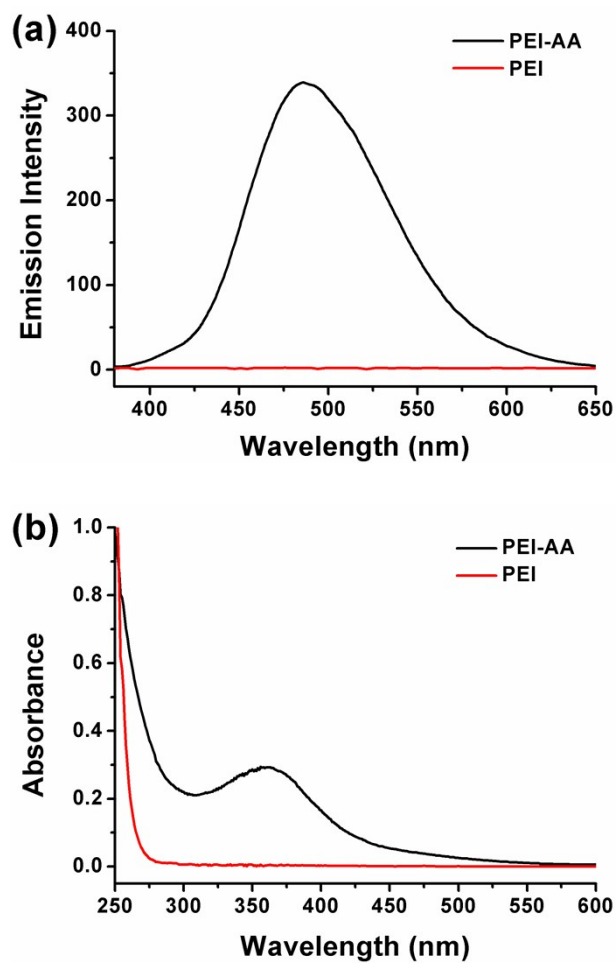

**Fig. S9** (a) Fluorescence emission and (b) UV-vis spectra of the PEI-AA NCPdots and PEI solution, respectively.



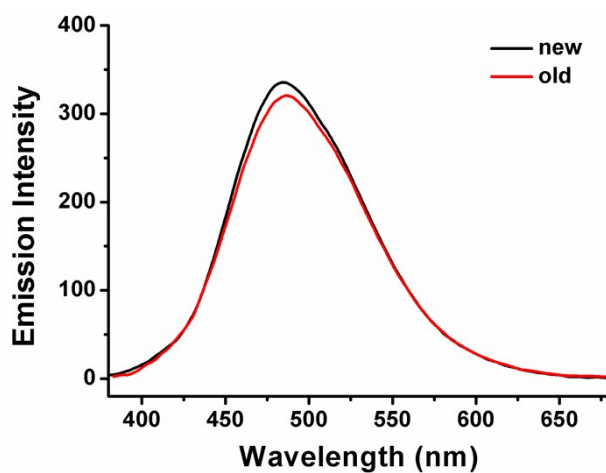

**Fig. S10** Fluorescence emission spectra of fresh prepared PEI-AA NCPdots (black line) and after stored under ambient conditions for 6 months (red line).

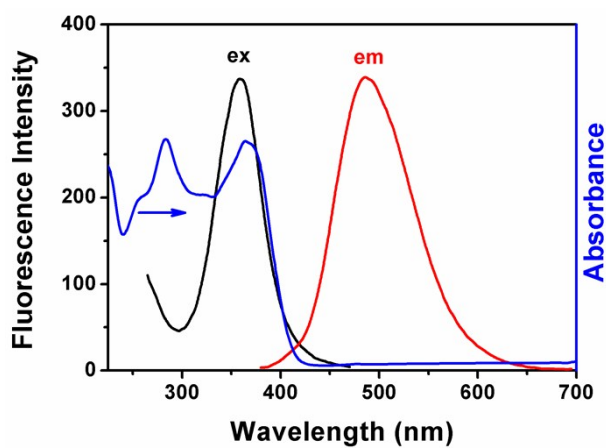

**Fig. S11** UV-vis absorption spectra of TC (blue line) and fluorescence spectra of the PEI-AA NCPdots (black and red line).

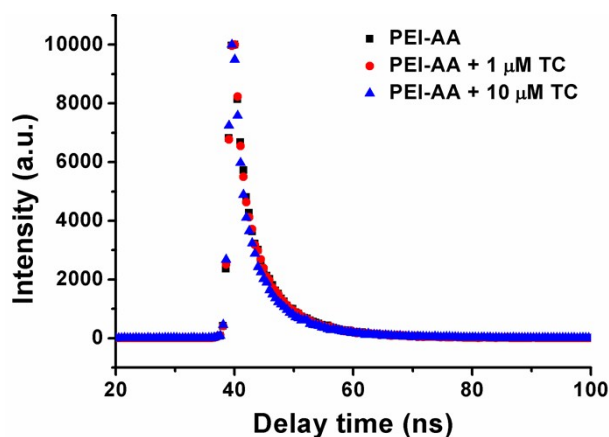

**Fig. S12** Fluorescence decay curves of the PEI-AA NCPdots before and after adding different amount of TC.

**Table S1** Detection of TC in milk samples.

| Sample | TC spiked | TC founded | RSD (% , n=3) | Recovery (%) |
|--------|-----------|------------|---------------|--------------|
| 1      | 90 nM     | 88.5 nM    | 4.20          | 98.33        |
| 2      | 2.1 μM    | 2.015 μM   | 3.12          | 95.95        |
| 3      | 8.1 μM    | 8.133 μM   | 6.39          | 100.41       |

**Table S2** Detection of TC in environmental water samples.

| Sample | TC spiked | TC founded | RSD (% , n=3) | Recovery (%) |
|--------|-----------|------------|---------------|--------------|
| 1      | 90 nM     | 90.7 nM    | 3.05          | 100.78       |
| 2      | 2.1 μM    | 2.038 μM   | 5.23          | 97.05        |
| 3      | 8.1 μM    | 8.014 μM   | 4.66          | 98.94        |

## References:

- [S1] J. R. Lakowicz, Principles of Fluorescence Spectroscopy, 3rd ed., Springer, New York **2006**.
- [S2] Y. Chen, H. Zhou, Y. Wang, W. Li, J. Chen, Q. Lin, C. Yu, Chem. Commun., **2013**, 49, 9821-9823.
